# Supplementary material for: Decision tool of medical endoscope maintenance service in Chinese hospitals: a conjoint analysis
Source: Springer Nature journal article supplement (doi:10.1186/s12913-023-10458-y), 2023-12-15
Supplement: MOESM1 [file 26533526]

# Maintenance Service Preference Questionnaire of Medical Endoscope

## Information of Participants

|                             |  |                     |  |                                                  |  |
|-----------------------------|--|---------------------|--|--------------------------------------------------|--|
| Hospital name:              |  | Hospital level:     |  | Department:                                      |  |
| Director of the Department: |  | Occupation / Title: |  | Mobile Phone/Email:                              |  |
| Participant Name:           |  | Occupation / Title: |  | The years for reletive work of medical endoscope |  |

Note 1: The manufacturer's maintenance service is divided into five factors: maintenance quality, maintenance price, maintenance response, maintenance efficiency and service provider, each factor with 2~3 level values.

Note 2: According to the actual situation of your hospital, which kind of after-sales service would you prefer to receive, and rate your preference for each group of after-sales service combination.

Note 3: Scoring is based on the preference combination of maintenance service level indicators. The scoring criteria are divided into five levels: very important / very good = 10; important / good = 8~9; general / general = 6~7; unimportant / relatively bad = 3~4; very unimportant / very bad = 1~2.

Sample: This combination roughly meets my requirements for endoscope service, but there are still some defects, so preference score is 7 .

| Order | Maintenance Quality   | Maintenance Prie                             | Maintenance EfficiencyMaintenance Response | Maintenance Efficiency           | Service Provision                                 | Preference Score (1-10) |
|-------|-----------------------|----------------------------------------------|--------------------------------------------|----------------------------------|---------------------------------------------------|-------------------------|
| 1     | Same Fault ≤ 6 months | Hard Endoscope ≤ 5000、Soft Endoscope ≤ 10000 | Maintenance Response ≤ 3 days              | Maintenance Efficiency ≤ 20 days | Service provided by the original manufacturers    |                         |
| 2     | Same Fault ≤ 6 months | Hard Endoscope ≤ 5000、Soft Endoscope ≤ 10000 | Maintenance Response ≤ 3 days              | Maintenance Efficiency ≤ 30 days | Service provided by third party service providers |                         |

|    |                                  |                                             |                              |                                 |                                                   |  |
|----|----------------------------------|---------------------------------------------|------------------------------|---------------------------------|---------------------------------------------------|--|
| 3  | Same Fault ≤6 months             | Hard Endoscope ≤5000、Soft Endoscope ≤10000  | Maintenance Response ≤1 day  | Maintenance Efficiency ≤10 days | Service provided by third party service providers |  |
| 4  | Same Fault ≤6 months             | Hard Endoscope ≤5000、Soft Endoscope ≤10000  | Maintenance Response ≤1 day  | Maintenance Efficiency ≤10 days | Service provided by the original manufacturers    |  |
| 5  | Same Fault ≤6 months             | Hard Endoscope ≤20000、Soft Endoscope ≤50000 | Maintenance Response ≤1 week | Maintenance Efficiency ≤10 days | Service provided by third party service providers |  |
| 6  | Same Fault ≤6 months             | Hard Endoscope ≤20000、Soft Endoscope ≤50000 | Maintenance Response ≤1 day  | Maintenance Efficiency ≤20 days | Service provided by third party service providers |  |
| 7  | Same Fault ≤6 months             | Hard Endoscope ≤10000、Soft Endoscope ≤30000 | Maintenance Response ≤1 week | Maintenance Efficiency ≤10 days | Service provided by the original manufacturers    |  |
| 8  | Same Fault ≤6 months             | Hard Endoscope ≤10000、Soft Endoscope ≤30000 | Maintenance Response ≤1 day  | Maintenance Efficiency ≤30 days | Service provided by the original manufacturers    |  |
| 9  | 6 months < Same Fault ≤12 months | Hard Endoscope ≤5000、Soft Endoscope ≤10000  | Maintenance Response ≤1 week | Maintenance Efficiency ≤30 days | Service provided by third party service providers |  |
| 10 | 6 months < Same Fault ≤12 months | Hard Endoscope ≤5000、Soft Endoscope ≤10000  | Maintenance Response ≤1 day  | Maintenance Efficiency ≤10 days | Service provided by the original manufacturers    |  |
| 11 | 6 months < Same Fault ≤12 months | Hard Endoscope ≤20000、Soft Endoscope ≤50000 | Maintenance Response ≤3 days | Maintenance Efficiency ≤10 days | Service provided by the original manufacturers    |  |
| 12 | 6 months < Same Fault ≤12 months | Hard Endoscope ≤10000、Soft Endoscope ≤30000 | Maintenance Response ≤1 day  | Maintenance Efficiency ≤20 days | Service provided by third party service providers |  |

|    |                        |                                               |                               |                                  |                                                   |  |
|----|------------------------|-----------------------------------------------|-------------------------------|----------------------------------|---------------------------------------------------|--|
| 13 | Same Fault > 12 months | Hard Endoscope ≤ 5000、Soft Endoscope ≤ 10000  | Maintenance Response ≤ 1 week | Maintenance Efficiency ≤ 20 days | Service provided by the original manufacturers    |  |
| 14 | Same Fault > 12 months | Hard Endoscope ≤ 5000、Soft Endoscope ≤ 10000  | Maintenance Response ≤ 1 day  | Maintenance Efficiency ≤ 10 days | Service provided by third party service providers |  |
| 15 | Same Fault > 12 months | Hard Endoscope ≤ 20000、Soft Endoscope ≤ 50000 | Maintenance Response ≤ 1 day  | Maintenance Efficiency ≤ 30 days | Service provided by the original manufacturers    |  |
| 16 | Same Fault > 12 months | Hard Endoscope ≤ 10000、Soft Endoscope ≤ 30000 | Maintenance Response ≤ 3 days | Maintenance Efficiency ≤ 10 days | Service provided by third party service providers |  |
